# Supplementary material for: Flavonone 3-hydroxylase Relieves Bacterial Leaf Blight Stress in Rice via Overaccumulation of Antioxidant Flavonoids and Induction of Defense Genes and Hormones
Source: MDPI journal article supplement (doi:10.3390/ijms22116152), 2021-06-07
Supplement: s1 [file s1]

**Table S1.** List of genes, primers and accession number.

| S.No | Gene Name | Primer                                                                    | Accession No   |
|------|-----------|---------------------------------------------------------------------------|----------------|
| 1    | F3H       | ATGGCGCCGGTGGCCACGAC (sense)<br>GATGAATCCGCCCTTCTTGCCG (antisense)        | MT980835.1     |
| 2    | FLS       | ATGGCGGAGGTGCAGAGCGT (sense)<br>TTACATGGGGAGCTTATTGATCTTGCA (antisense)   | XM_015769329.2 |
| 3    | DFR       | ATGGGCGAGGCGGTGAAGGG (sense)<br>TCATTTGACCAACGCTTCTGTTTCAGC (antisense)   | MK636607.1     |
| 4    | SLR1      | ATGAAGCGCGAGTACCAAGAAGC (sense)<br>TCACGCCGCGGCGACGCGCCATGCC (antisense)  | XM_015776057.2 |
| 5    | NPR1      | ATGGAGCCGCCGACCAGCCACGT (sense)<br>TCATCTCCTTGGTGCAATGGC (antisense)      | HM991169.1     |
| 6    | Xa1       | ACTGCCCTCTTGACACGCCTTTGG (sense)<br>CCGGTACATCAGTATTGTCCATCGG (antisense) | AB002266       |

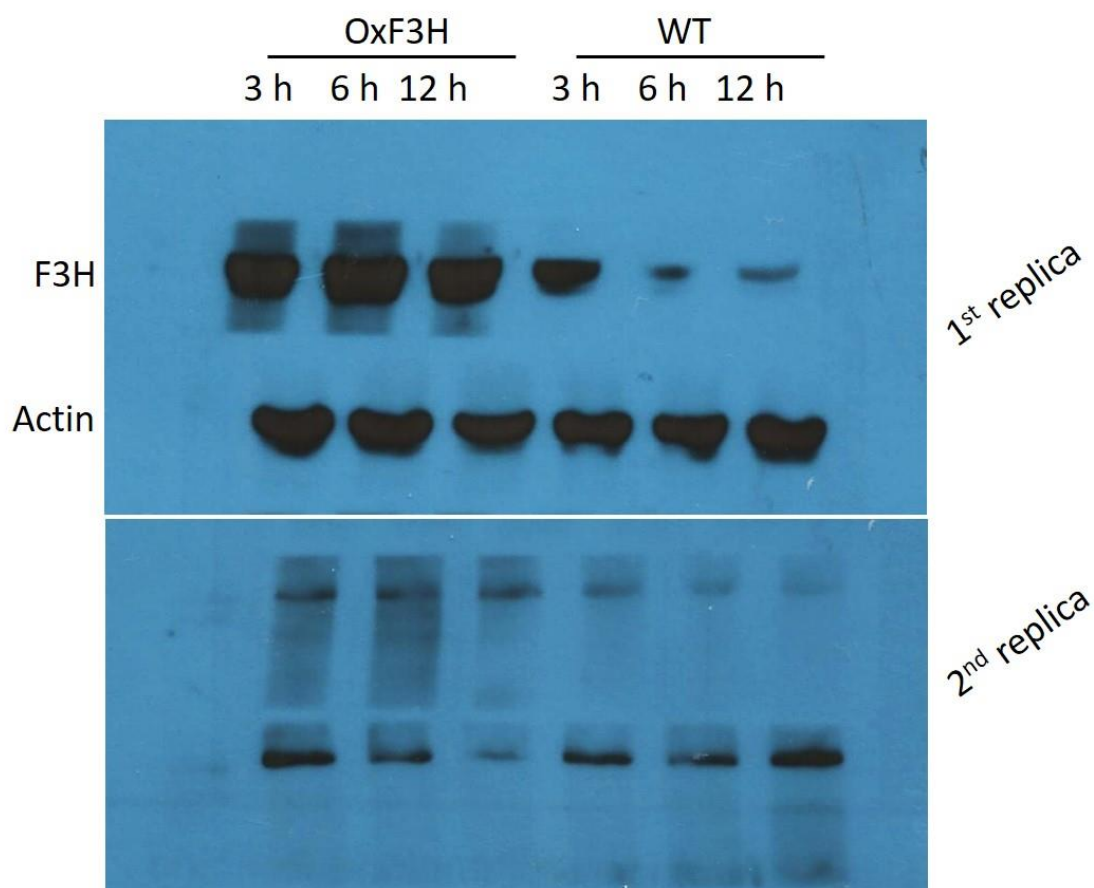**Figure S1.** Western blot analysis of F3H protein accumulation in OxF3H and WT plants. The expression pattern was analyzed after 3, 6 and 12 hour of post inoculation of Xoo. Actin was used as reference protein.
